# Supplementary material
Source: PubMed Central journal article supplement (PMC8519299)
Supplement: iai.00800-20-s0003.pdf [file iai.00800-20-s0003.pdf]

**Table S1 : Table of the number of mice/ number of individual experiments for all graphs in the paper**

| Figure 1 |              | not infected | 2d  | 3d  | 4d  | 7d  | 14d | 21d | 30d | 50d | 3d post reinfection (d50) | 6d post reinfection (d50) |
|----------|--------------|--------------|-----|-----|-----|-----|-----|-----|-----|-----|---------------------------|---------------------------|
|          | NK cells     | 8/3          | 3/1 | 3/1 | 9/3 | 6/2 | 6/2 | 3/1 | 6/2 | 9/3 | 3/1                       | 7/3                       |
|          | ILC1         | 8/3          | 3/1 | 3/1 | 9/3 | 6/2 | 6/2 | 3/1 | 6/2 | 8/3 | 3/1                       | 8/3                       |
|          | ILC2         | 6/2          | 3/1 | 3/1 | 9/3 | 6/2 | 6/2 | 3/1 | 6/2 | 9/3 | 3/1                       | 8/3                       |
|          | ILC3         | 3/1          | -   | -   | 6/2 | 3/1 | 3/1 | -   | 3/1 | 3/1 | -                         | 3/1                       |
|          | exRORYt ILC3 | 5/2          | 5/2 | 6/2 | 3/1 | 2/1 | -   | -   | -   | -   | -                         | -                         |

| Figure 2 |                      | not infected |               |       | 4d     |               |       | 7d     |               |       | 30d    |               |       |
|----------|----------------------|--------------|---------------|-------|--------|---------------|-------|--------|---------------|-------|--------|---------------|-------|
|          |                      | Cervix       | Uterine horns | Ovary | Cervix | Uterine horns | Ovary | Cervix | Uterine horns | Ovary | Cervix | Uterine horns | Ovary |
|          | cNK (per mg tissue)  | 3/1          | 2/1           | 3/1   | 3/1    | 3/1           | 3/1   | 8/3    | 9/3           | 9/3   | 12/4   | 11/4          | 12/4  |
|          | trNK (per mg tissue) | 3/1          | 2/1           | 3/1   | 3/1    | 3/1           | 3/1   | 8/3    | 9/3           | 9/3   | 5/2    | 8/3           | 9/3   |
|          | ILC1 (per mg tissue) | 3/1          | 2/1           | 3/1   | 3/1    | 3/1           | 3/1   | 8/3    | 9/3           | 9/3   | 9/3    | 8/3           | 9/3   |
|          | ILC2 (per mg tissue) | -            | -             | -     | 3/1    | 3/1           | 3/1   | 8/3    | 9/3           | 9/3   | 12/4   | 11/4          | 12/4  |
|          | cNK                  | 5/2          | 5/2           | 5/2   | 6/2    | 6/2           | 6/2   | 8/3    | 9/3           | 9/3   | 9/3    | 9/3           | 9/3   |
|          | trNK                 | 5/2          | 5/2           | 5/2   | 6/2    | 6/2           | 6/2   | 8/3    | 9/3           | 9/3   | 9/3    | 9/3           | 9/3   |
|          | ILC1                 | 5/2          | 5/2           | 5/2   | 6/2    | 6/2           | 6/2   | 8/3    | 8/3           | 8/3   | 9/3    | 9/3           | 9/3   |
| ILC2     | 5/2                  | 5/2          | 5/2           | 6/2   | 6/2    | 6/2           | 8/3   | 8/3    | 8/3           | 12/4  | 12/4   | 12/4          |       |

| Figure 3 | IFN $\gamma$ |      | not infected | 4d  | 7d  | 30d |
|----------|--------------|------|--------------|-----|-----|-----|
|          |              | cNK  | 6/2          | 6/2 | 8/3 | 9/3 |
|          |              | trNK | 6/2          | 6/2 | 8/3 | 9/3 |
|          | TNF          | ILC1 | 6/2          | 9/3 | 9/3 | 9/3 |
|          |              | cNK  | 6/2          | 6/2 | 9/3 | 9/3 |
|          |              | trNK | 6/2          | 6/2 | 9/3 | 9/3 |
|          | ILC1         | 6/2  | 6/2          | 9/3 | 9/3 |     |

| Figure 4 | IL-15   |                    | 2d  | 3d  | 4d  | 7d  | 14d | 21d | 30d |
|----------|---------|--------------------|-----|-----|-----|-----|-----|-----|-----|
|          |         | Cervix             | 3/1 | 3/1 | 3/1 | 5/2 | 6/2 | 3/1 | 8/3 |
|          |         | lower uterine horn | 3/1 | 3/1 | 3/1 | 5/2 | 6/2 | 2/1 | 9/3 |
|          |         | upper uterine horn | 3/1 | 3/1 | 2/1 | 5/2 | 6/2 | 3/1 | 9/3 |
|          | Oviduct | 3/1                | 3/1 | 3/1 | 5/2 | 6/2 | 3/1 | 9/3 |     |
|          | IL-18   | Cervix             | -   | -   | -   | 5/2 | 6/2 | 3/1 | 8/3 |
|          |         | lower uterine horn | -   | -   | -   | 5/2 | 6/2 | 2/1 | 9/3 |
|          |         | upper uterine horn | -   | -   | -   | 5/2 | 6/2 | 3/1 | 9/3 |
|          |         | Oviduct            | -   | -   | -   | 5/2 | 6/2 | 3/1 | 9/3 |
|          | IL-33   | Cervix             | 3/1 | 3/1 | 3/1 | 5/2 | 6/2 | 3/1 | 8/3 |
|          |         | lower uterine horn | 3/1 | 3/1 | 3/1 | 5/2 | 5/2 | 2/1 | 9/3 |
|          |         | upper uterine horn | 3/1 | 3/1 | 2/1 | 5/2 | 6/2 | 3/1 | 9/3 |
|          |         | Oviduct            | 3/1 | 3/1 | 3/1 | 5/2 | 6/2 | 3/1 | 9/3 |

| Figure 5 |     | not infected        |                     | 4d                  |                     | 7d                  |                     | 30d |                     |
|----------|-----|---------------------|---------------------|---------------------|---------------------|---------------------|---------------------|-----|---------------------|
|          |     | WT                  | CCR2 <sup>-/-</sup> | WT                  | CCR2 <sup>-/-</sup> | WT                  | CCR2 <sup>-/-</sup> | WT  | CCR2 <sup>-/-</sup> |
|          | NK  | 8/3                 | 9/3                 | 9/3                 | 6/2                 | 6/2                 | 6/2                 | 6/2 | 6/2                 |
| ILC1     | 8/3 | 9/3                 | 9/3                 | 6/2                 | 6/2                 | 6/2                 | 6/2                 | 6/2 | 6/2                 |
| ILC2     | 6/2 | 9/3                 | 9/3                 | 6/2                 | 6/2                 | 6/2                 | 6/2                 | 6/2 | 6/2                 |
|          | WT  | Rag1 <sup>-/-</sup> | WT                  | Rag1 <sup>-/-</sup> | WT                  | Rag1 <sup>-/-</sup> | -                   | -   | -                   |
| NK       | 8/3 | 3/1                 | 9/3                 | 3/1                 | 6/2                 | 3/1                 | -                   | -   | -                   |
| ILC1     | 8/3 | 3/1                 | 9/3                 | 3/1                 | 6/2                 | 3/1                 | -                   | -   | -                   |
| ILC2     | 6/2 | 3/1                 | 9/3                 | 3/1                 | 6/2                 | 3/1                 | -                   | -   | -                   |

| Figure 6 | cNK  | 27/8 |
|----------|------|------|
|          | trNK | 27/8 |
|          | ILC1 | 27/8 |
|          | ILC2 | 27/8 |

| Suppl. Figure 2 |      | not infected |         | 4d  |         | 7d  |         | 31d |         |
|-----------------|------|--------------|---------|-----|---------|-----|---------|-----|---------|
|                 |      | WT           | vavBcl2 | WT  | vavBcl2 | WT  | vavBcl2 | WT  | vavBcl2 |
|                 | ILC2 | 6/2          | 6/2     | 9/3 | 6/2     | 6/2 | 5/2     | -   | -       |
| cNK             | -    | -            | -       | -   | -       | -   | -       | 3/1 | 3/1     |
| trNK            | -    | -            | -       | -   | -       | -   | -       | 3/1 | 3/1     |

| Suppl. Figure 4 |                | not infected | 1d  | 2d  | 3d  | 4d   | 7d  | 14d | 21d | 30d |
|-----------------|----------------|--------------|-----|-----|-----|------|-----|-----|-----|-----|
|                 | Lower cervix   | 14/5         | 3/1 | 5/2 | 3/1 | 12/4 | 8/3 | 9/3 | 2/1 | 6/2 |
|                 | Upper cervix   | 14/5         | 3/1 | 5/2 | 3/1 | 12/4 | 8/3 | 9/3 | 2/1 | 6/2 |
|                 | Uterine horn 1 | 14/5         | 3/1 | 5/2 | 3/1 | 12/4 | 8/3 | 9/3 | 2/1 | 6/2 |
|                 | Uterine horn 2 | 14/5         | 3/1 | 5/2 | 3/1 | 12/4 | 8/3 | 9/3 | 2/1 | 6/2 |
|                 | Uterine horn 3 | 14/5         | 3/1 | 5/2 | 3/1 | 12/4 | 8/3 | 9/3 | 2/1 | 6/2 |
|                 | Oviduct        | 14/5         | 3/1 | 5/2 | 3/1 | 12/4 | 8/3 | 9/3 | 2/1 | 6/2 |

| Suppl. Figure 5 |      | not infected |                     | 30d  |                     |
|-----------------|------|--------------|---------------------|------|---------------------|
|                 |      | WT           | Ncr1 <sup>-/-</sup> | WT   | Ncr1 <sup>-/-</sup> |
|                 | cNK  | 5/2          | 6/2                 | 9/3  | 6/2                 |
|                 | trNK | 5/2          | 6/2                 | 9/3  | 6/2                 |
|                 | ILC1 | 5/2          | 6/2                 | 9/3  | 6/2                 |
|                 | ILC2 | 5/2          | 6/2                 | 12/4 | 6/2                 |

| Suppl. Figure 6 |           | not infected |                     | 4d  |                     | 7d  |                     | 30d |                     |
|-----------------|-----------|--------------|---------------------|-----|---------------------|-----|---------------------|-----|---------------------|
|                 |           | WT           | Ccr2 <sup>-/-</sup> | WT  | Ccr2 <sup>-/-</sup> | WT  | Ccr2 <sup>-/-</sup> | WT  | Ccr2 <sup>-/-</sup> |
|                 | Monocytes | 6/2          | 6/2                 | 9/3 | 6/2                 | 9/3 | 6/2                 | 6/2 | 6/2                 |
| Neutrophils     | 6/2       | 6/2          | 9/3                 | 6/2 | 9/3                 | 6/2 | 6/2                 | 6/2 |                     |

|                 |             |     |
|-----------------|-------------|-----|
| Suppl. Figure 7 | Neutrophils | 9/3 |
|                 | Monocytes   | 9/3 |
|                 | T cells     | 9/3 |

|                 |      |      |
|-----------------|------|------|
| Suppl. Figure 8 | cNK  | 10/4 |
|                 | trNK | 10/4 |
|                 | ILC1 | 10/4 |
|                 | ILC2 | 10/4 |
